# Supplementary material for: High-performance ammonia fixation electrocatalyzed by ReS2 nanosheet array
Source: Royal Society of Chemistry journal article supplement (doi:10.1039/d1nj01896e), 2021-01-01
Supplement: d1nj01896e1.pdf [file d1nj01896e1.pdf]

## Electronic Supplementary Information

### Experimental Section

**Materials:** salicylic acid ( $C_7H_6O_3$ ), hydroxy rhenium ammoniate ( $NH_4ReO_4$ ), trisodium citrate dihydrate ( $Na_3C_6H_5O_7 \cdot 2H_2O$ ), sodium hypochlorite ( $NaClO$ ), sodium nitroferricyanide ( $C_5FeN_6Na_2O$ ), thiourea ( $CN_2H_4S$ ) and para-(dimethylamino) benzaldehyde ( $C_9H_{11}NO$ ) were purchased from Sigma-Aldrich Chemical Reagent Co., Ltd. Hydrochloric acid ( $HCl$ ) and ethanol ( $C_2H_5OH$ ) were purchased from Aladdin Ltd. (Shanghai, China). Ultrapure water is used throughout all experiments was purified through a Millipore system.

**Preparation of  $ReS_2/CC$ :**  $ReS_2$  nanosheets array on carbon cloth ( $ReS_2/CC$ ) electrode was prepared by simple hydrothermal method. In a typical step, 0.10 mmol  $NH_4ReO_4$  and 1.0 mmol thiourea ( $CN_2H_4S$ ) were dissolved in 30 mL deionized water to form a clarifying solution. Carbon cloth ( $2 \times 1 \text{ cm}^2$ ) was cleaned in deionized water, ethanol, and acetone for 15 minutes, respectively. The above solution and carbon cloth were then transferred to a 50 mL stainless steel autoclave lined with PTFE and sealed for 26 h at 200 °C. After cooling to room temperature,  $ReS_2/CC$  is cooled to room temperature. Take out the sample and rinse with the water and ethanol for several times. The  $ReS_2/CC$  was dried naturally in the atmosphere.

**Electrochemical measurements:** Before NRR tests, a salt bridge is built which is filled with agar and saturated  $KCl$  solution. Electrochemical measurements were performed with a CHI 660E electrochemical analyzer in a standard three-electrode system using  $ReS_2/CC$  as working electrode,  $Ag/AgCl$  as reference electrode, and graphite rod as counter electrode. All experiments were carried out at room temperature (25 °C) and all potentials reported in this work were calibrated to RHE, using the following equation:

$$E \text{ (RHE)} = E \text{ (Ag/AgCl)} + (0.197 + 0.059 \text{ pH}) \text{ V}$$

**Determination of  $NH_3$ :** The produced ammonia was estimated by indophenol blue method by ultraviolet spectrum. In detail, 5 mL of post-tested solution was got from the electrochemical reaction vessel. Then, 1 mL of 1 M  $NaOH$  solution (contains 5 wt%

salicylic acid and 5 wt% sodium citrate) was followed by addition of 0.5 mL of 0.05 M NaClO and 0.1 mL of C<sub>3</sub>FeN<sub>6</sub>Na<sub>2</sub>O (1 wt%). After standing at 25 °C for 2 h, the UV-Vis absorption spectrum was measured. The concentration of indophenol blue was determined using the absorbance at wavelength of 655 nm. The concentration–absorbance curve was calibrated using standard ammonia chloride solution with a series of concentrations. The fitting curve ( $Y = 0.299X + 0.084$ ,  $R^2 = 0.996$ ) shows good linear relation of absorbance value with NH<sub>4</sub>Cl concentration by three times independent calibrations.

**Determination of N<sub>2</sub>H<sub>4</sub>:** The N<sub>2</sub>H<sub>4</sub> present in the electrolyte was determined by the method of Watt and Chrisp. The p-C<sub>9</sub>H<sub>11</sub>NO (5.99 g), HCl (30 mL), and C<sub>2</sub>H<sub>5</sub>OH (300 mL) were mixed and used as a color reagent. In detail, 5 mL electrolyte was removed from the electrochemical reaction vessel, and added into 5 mL prepared color reagent and stirred 15 min at 25 °C. The obtained calibration curve of N<sub>2</sub>H<sub>4</sub> is  $Y = 0.676X + 0.052$ ,  $R^2 = 0.999$ .

**Calculations of  $\nu_{\text{NH}_3}$  and FE:**  $\nu_{\text{NH}_3}$  was calculated using the following equation:

$$\nu_{\text{NH}_3} = [\text{NH}_4\text{Cl}] \times V / (17 \times 10^6 \times t \times A) \text{ (mol s}^{-1} \text{ cm}^{-2}\text{)}$$

FE was calculated according to following equation:

$$\text{FE} = 3 \times F \times [\text{NH}_4\text{Cl}] \times V / (53.5 \times 10^6 \times Q)$$

Where [NH<sub>4</sub>Cl] is the measured NH<sub>4</sub>Cl concentration; V is the volume of the cathodic reaction electrolyte; t is the potential applied time; m is the loaded quality of catalyst; F is the Faraday constant; and Q is the quantity of applied electricity.

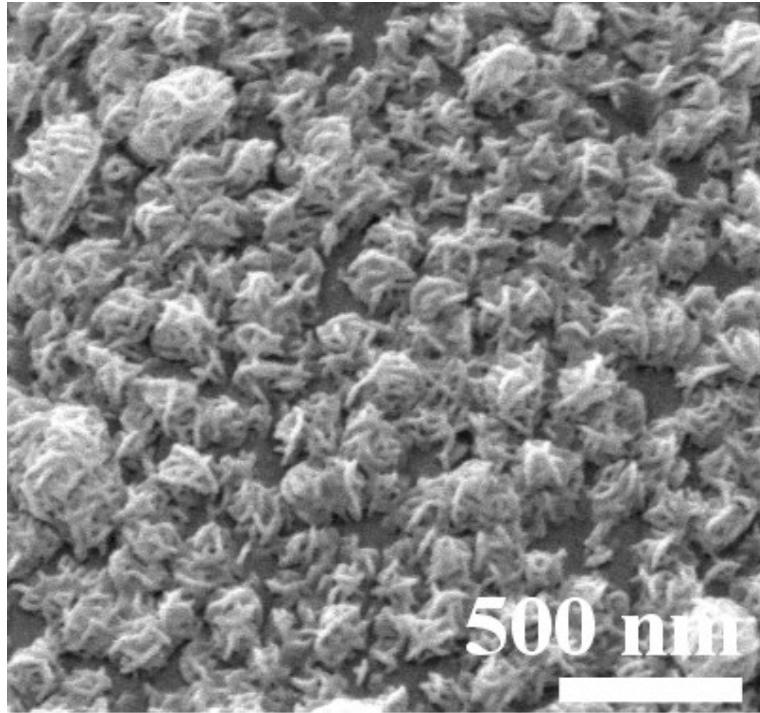

**Fig. S1.** High-magnifications SEM images of ReS<sub>2</sub>/CC.

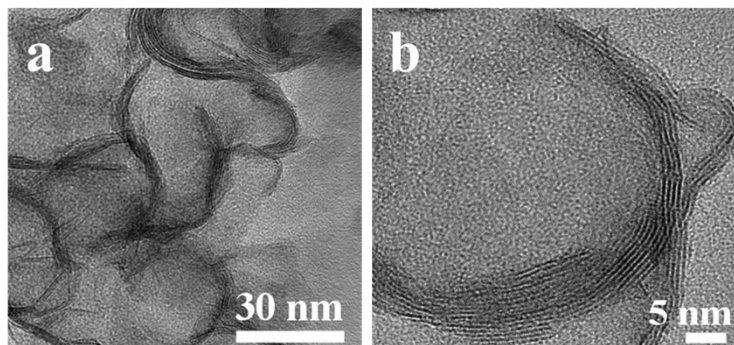

**Fig. S2.** High-magnification TEM images of ReS<sub>2</sub> nanosheet.

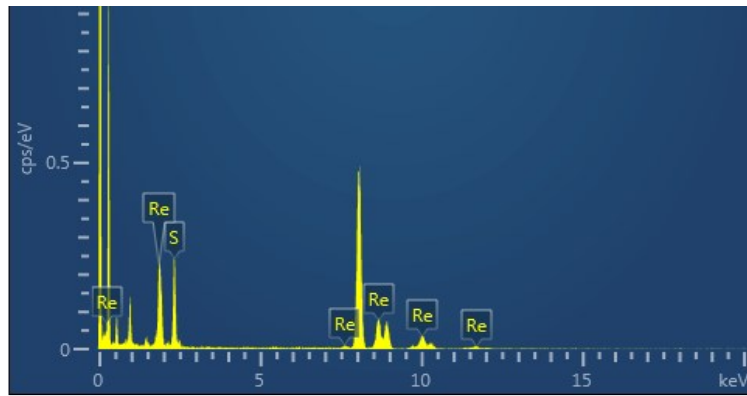

**Fig. S3.** EDS spectrum of ReS<sub>2</sub> nanosheet.

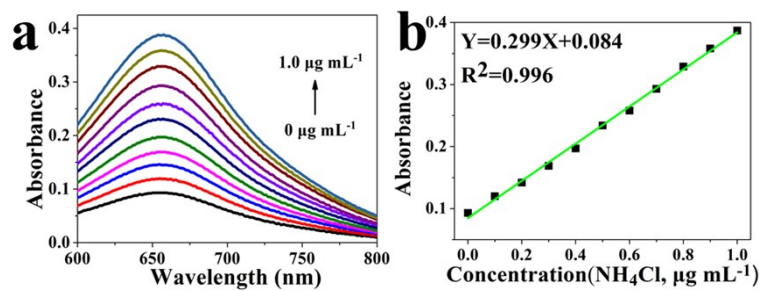

**Fig. S4.** (a) UV-Vis spectra of indophenol assays with  $\text{NH}_4\text{Cl}$  after incubated for 2 h at room temperature. (b) Calibration curve used for estimation of  $\text{NH}_4\text{Cl}$ .

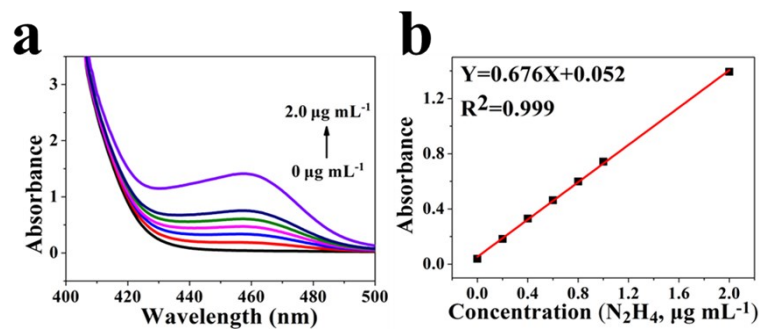

**Fig. S5.** (a) UV-Vis spectra of various  $N_2H_4$  concentration after incubated for 20 min at room temperature. (b) Calibration curve used for calculation of  $N_2H_4$ .

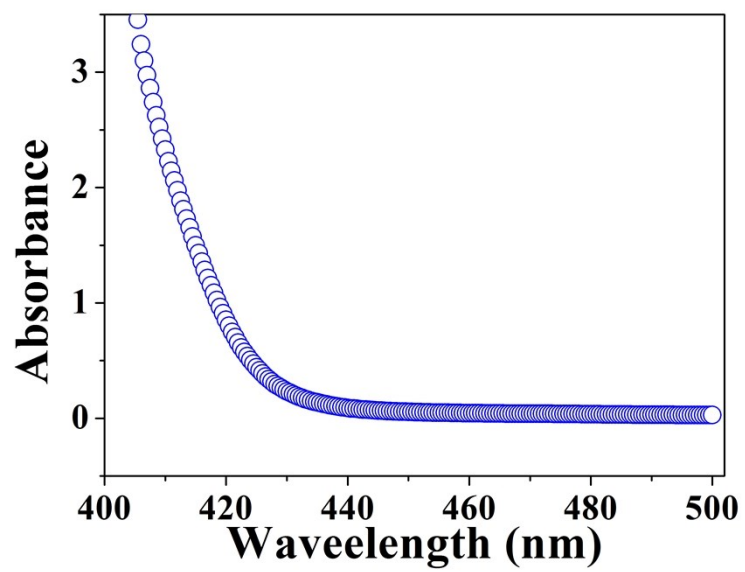

**Fig. S6.** UV-Vis absorption spectrum of ReS<sub>2</sub>/CC catalyst after charging at  $-0.4$  V vs. RHE after incubated with N<sub>2</sub>H<sub>4</sub> color agent for 15 min at room temperature.



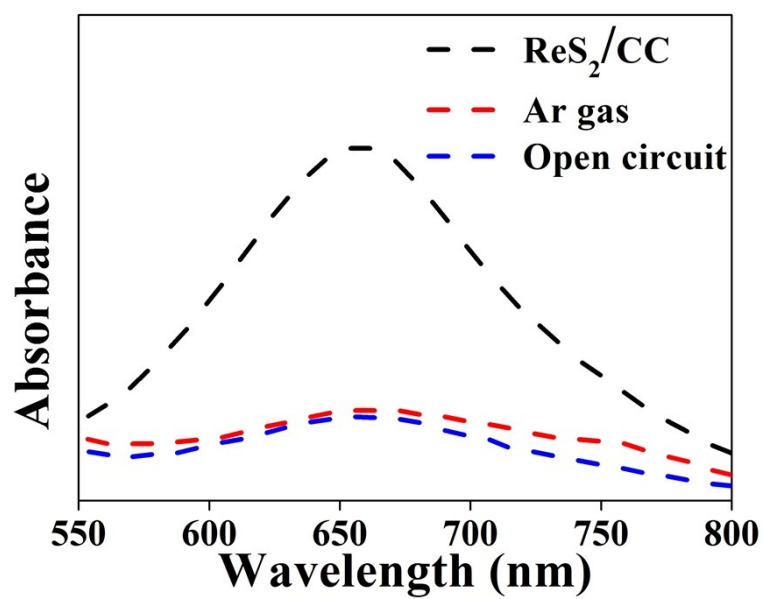

**Fig. S7.** UV-Vis absorption spectra of the electrolyte stained with indophenol indicator after charging at  $-0.4$  V vs. RHE for 2 h under different electrochemical conditions.

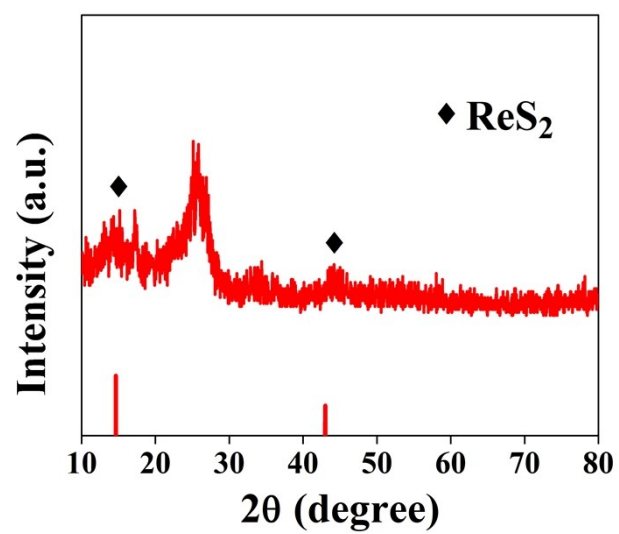

**Fig. S8.** XRD pattern for ReS<sub>2</sub>/CC after NRR process.

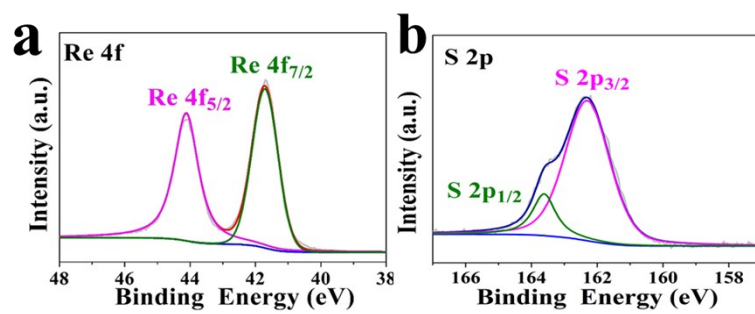

**Fig. S9.** XPS spectra for  $\text{ReS}_2$  in (a) Re 4f and (b) S 2p regions after NRR process.

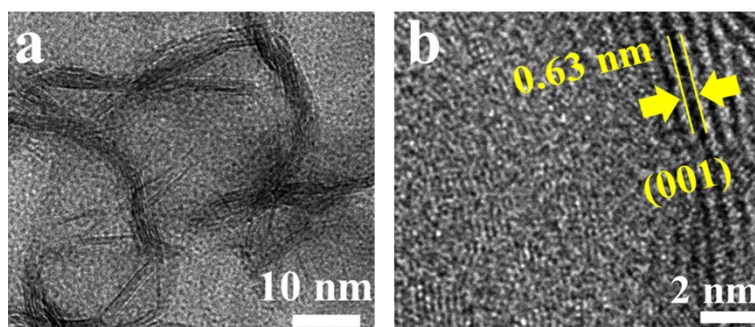

**Fig. S10.** (a) TEM and (b) HRTEM images for ReS<sub>2</sub> nanosheet after NRR process.

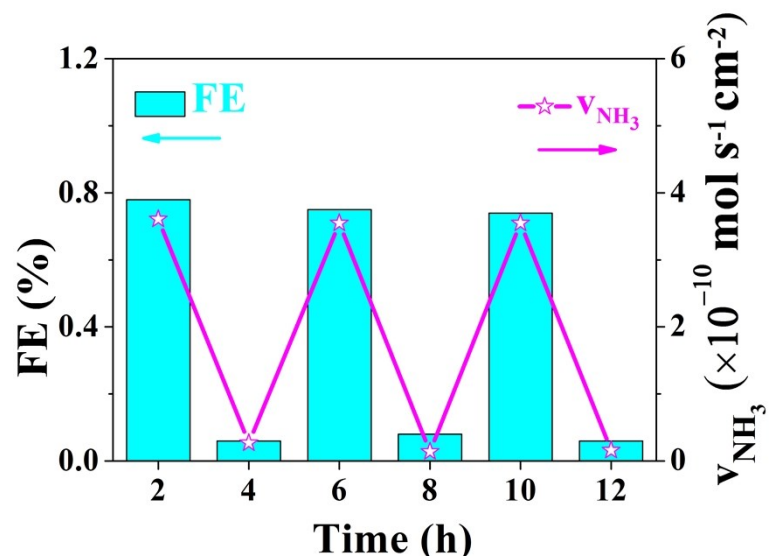

**Fig. S11.**  $v_{\text{NH}_3}$  and FEs at potential of  $-0.4 \text{ V}$  vs. RHE of  $\text{ReS}_2/\text{CC}$  in  $\text{N}_2$  and Ar-saturated electrolytes.

**Table S1.** Comparison of the electrocatalytic N<sub>2</sub> reduction performance for ReS<sub>2</sub>/CC with other NRR catalysts under ambient conditions.

| Catalyst                                 | NH <sub>3</sub> yield rate ( $v_{\text{NH}_3}$ )                            | FE (%)        | Ref.             |
|------------------------------------------|-----------------------------------------------------------------------------|---------------|------------------|
| <b>ReS<sub>2</sub>/CC</b>                | <b><math>3.61 \times 10^{-10} \text{ mol s}^{-1} \text{ cm}^{-2}</math></b> | <b>0.78 %</b> | <b>This work</b> |
| Fe <sub>2</sub> O <sub>3</sub> /CNTs     | $4.7 \times 10^{-10} \text{ mol s}^{-1} \text{ cm}^{-2}$                    | 0.15 %        | 1                |
| Fe <sub>3</sub> O <sub>4</sub> /Ti       | $0.56 \times 10^{-10} \text{ mol s}^{-1} \text{ cm}^{-2}$                   | 2.6 %         | 2                |
| $\gamma$ -Fe <sub>2</sub> O <sub>3</sub> | $2.08 \times 10^{-10} \text{ mol s}^{-1} \text{ mg}^{-1}$                   | 1.9 %         | 3                |
| Ru/C                                     | $2.06 \times 10^{-10} \text{ mol s}^{-1} \text{ cm}^{-2}$                   | 0.28 %        | 4                |
| Mo nanofilm                              | $0.31 \times 10^{-10} \text{ mol s}^{-1} \text{ cm}^{-2}$                   | 0.72 %        | 5                |
| MoN                                      | $3.01 \times 10^{-10} \text{ mol s}^{-1} \text{ cm}^{-2}$                   | 1.15 %        | 6                |
| MoO <sub>3</sub>                         | $2.88 \times 10^{-8} \text{ mol s}^{-1} \text{ mg}^{-1}$                    | 1.9 %         | 7                |
| MoS <sub>2</sub>                         | $0.81 \times 10^{-10} \text{ mol s}^{-1} \text{ cm}^{-2}$                   | 1.17 %        | 8                |
| Mo <sub>2</sub> N                        | $7.68 \times 10^{-8} \text{ mol s}^{-1} \text{ mg}^{-1}$                    | 4.5 %         | 9                |
| Ag                                       | $0.46 \times 10^{-10} \text{ mol s}^{-1} \text{ cm}^{-2}$                   | 4.8 %         | 10               |
| VN/CC                                    | $2.48 \times 10^{-10} \text{ mol}^{-1} \text{ s}^{-1} \text{ cm}^{-2}$      | 3.58 %        | 11               |
| CoS/NS-G                                 | $2.56 \times 10^{-10} \text{ mol s}^{-1} \text{ mg}^{-1}$                   | 15.6 %        | 12               |
| CoS <sub>2</sub> /NS-G                   | $4.08 \times 10^{-10} \text{ mol s}^{-1} \text{ mg}^{-1}$                   | 25.9 %        | 12               |
| 3R MoS <sub>2</sub>                      | $1.43 \times 10^{-10} \text{ mol s}^{-1} \text{ mg}^{-1}$                   | 8.8 %         | 13               |
| Sn/SnS <sub>2</sub>                      | $3.87 \times 10^{-10} \text{ mol s}^{-1} \text{ mg}^{-1}$                   | 6.5 %         | 14               |
| FeS <sub>2</sub>                         | $6.08 \times 10^{-10} \text{ mol s}^{-1} \text{ mg}^{-1}$                   | 11.2 %        | 15               |

## References

- 1 S. Chen, P. S. Perathoner, P. C. Ampelli, C. Mebrahtu, P. D. Su and P. G. Centi, *Angew. Chem. Int. Ed.*, 2017, **56**, 2699–2703.
- 2 Q. Liu, X. Zhang, B. Zhang, Y. Luo, G. Cui, F. Xie and X. Sun, *Nanoscale*, 2018, **10**, 14386–14389.
- 3 J. Kong, A. Lim, C. Yoon, J. H. Jang, H. C. Ham, J. Han, S. Nam, D. Kim, Y-E Sung, J. Choi and H. S. Park, *ACS Sustainable Chem. Eng.*, 2017, **5**, 10986–10995.
- 4 V. Kordali, G. Kyriacou and C. Lambrou, *Chem. Commun.*, 2000, **0**, 1673–1674.
- 5 D. Yang, T. Chen and Z. Wang, *J. Mater. Chem. A*, 2017, **5**, 18967–18971.
- 6 L. Zhang, X. Ji, X. Ren, Y. Luo, X. Shi, A. M. Asiri, B. Zheng and X. Sun, *ACS Sustainable Chem. Eng.*, 2018, **6**, 9550–9554.
- 7 J. Han, X. Ji, X. Ren, G. Cui, L. Li, F. Xie, H. Wang, B. Li and X. Sun, *J. Mater. Chem. A*, 2018, **6**, 12974–12977.
- 8 L. Zhang, X. Ji, X. Ren, Y. Ma, X. Shi, Z. Tian, A. M. Asiri, L. Chen, B. Tang and X. Sun, *Adv. Mater.*, 2018, **30**, 1800191.
- 9 X. Ren, G. Cui, L. Chen, F. Xie, Q. Wei, Z. Tian and X. Sun, *Chem. Commun.*, 2018, **54**, 8474–8477.
- 10 H. Huang, L. Xia, X. Shi, A. M. Asiri and X. Sun, *Chem. Commun.*, 2018, **54**, 11427–11430.
- 11 X. Zhang, R. Kong, H. Du, L. Xia and F. Qu, *Chem. Commun.*, 2018, **54**, 5323–5325.
- 12 P. Chen, N. Zhang, S. Wang, T. Zhou, Y. Tong, C. Ao, W. Yan, L. Zhang, W. Chu, C. Wu and Y. Xie, *Proc. Natl. Acad. Sci. U S A.*, 2019, **116**, 6635–6640.
- 13 B. Fang, J. Yao, X. Zhang, L. Ma, Y. Ye, J. Tang, G. Zou, J. Zhang, L. Jiang and Y. Sun, *New J. Chem.*, 2021, **45**, 2488–2495.
- 14 P. Li, W. Fu, P. Zhuang, Y. Cao, C. Tang, A. B. Watson, P. Dong, J. Shen and M. Ye, *Small*, 2019, **15**, 1902535.

15 H. Du, C. Yang, W. Pu, L. Zeng and J. Gong, *ACS Sustain. Chem. Eng.*, 2020, **8**, 10572-10580.
